# Supplementary material
Source: PubMed Central journal article supplement (PMC8861774)
Supplement: sj-pdf-1-dst-10.1177_1932296820985570.pdf [file sj-pdf-1-dst-10.1177_1932296820985570.pdf]

**Supplementary Information**

|               | MBG  | mage | conga.1 | conga.2 | conga.3 | conga.4 | SD  | j.index | CV   | TimeInRange | eA1c | HBGI | LBGI |
|---------------|------|------|---------|---------|---------|---------|-----|---------|------|-------------|------|------|------|
| Subject 1.csv | 6.9  | 3.5  | 1.5     | 2       | 2.4     | 2.5     | 1.8 | 24.6    | 26.9 | 91.7        | 5.9  | 1.8  | 0.4  |
| Subject 2.csv | 12.1 | 4.6  | 1.6     | 2.5     | 3.2     | 3.5     | 2.9 | 73.2    | 24   | 26.4        | 9.2  | 16.2 | 0    |
| Subject 3.csv | 8.5  | 5    | 2.2     | 3.4     | 4       | 4       | 2.5 | 39.5    | 29.1 | 81.3        | 7    | 5.1  | 0.1  |
| Subject 4.csv | 7.2  | 2.7  | 1.3     | 1.7     | 1.9     | 2       | 1.6 | 25.1    | 22.4 | 95          | 6.1  | 1.9  | 0.4  |
| Subject 5.csv | 9.7  | 6.4  | 2.9     | 4.1     | 4.5     | 4.6     | 3.3 | 54.3    | 33.5 | 62.1        | 7.7  | 8.9  | 0.2  |

Supplementary Table 1: Values of the overlapping metrics obtained from CGMStatsAnalyser

|               | MBG  | mage | conga.1 | conga.2 | conga.3 | conga.4 | sd  | J index | cv   | Time in range | eA1c | HBGI | LBGI |
|---------------|------|------|---------|---------|---------|---------|-----|---------|------|---------------|------|------|------|
| Subject 1.csv | 6.9  | 3    | 1.4     | 2       | 2.3     | 2.4     | 1.8 | 24.6    | 26.9 | 91.7          | 5.9  | 1.8  | 0.4  |
| Subject 2.csv | 12.1 | 4.3  | 1.4     | 2.3     | 2.9     | 3.2     | 2.9 | 73.3    | 24   | 26.4          | 9.2  | 16.2 | 0    |
| Subject 3.csv | 8.5  | 4.3  | 2.2     | 3.3     | 3.9     | 4       | 2.5 | 39.5    | 29.1 | 81.3          | 7    | 5.1  | 0.1  |
| Subject 4.csv | 7.2  | 2.4  | 1.3     | 1.7     | 1.9     | 2       | 1.6 | 25.2    | 22.4 | 95            | 6.1  | 1.9  | 0.4  |
| Subject 5.csv | 9.7  | 5    | 2.7     | 4.1     | 4.5     | 4.6     | 3.3 | 54.4    | 33.5 | 62.1          | 7.7  | 8.9  | 0.2  |

Supplementary Table 2: Values of the overlapping metrics obtained from iglu
